# Supplementary material for: Fine control for the preparation of ceria nanorods (111)
Source: Royal Society of Chemistry journal article supplement (doi:10.1039/d3ra02817h), 2023-01-01
Supplement: d3ra02817h1.pdf [file d3ra02817h1.pdf]

**Supplementary Information**

for

**Fine Control for the Preparation of Ceria Nanorods (111)**

Changju Yang, Xiang Ning, Shanyong Chen, Xiaoxia Hou, Xiaoli Xia, Zhiyang Zhang, Weiping Ding,  
Luming Peng\*

Key Laboratory of Mesoscopic Chemistry of MOE, School of Chemistry and Chemical Engineering, Nanjing  
University, Nanjing 210023, China

\*Corresponding Author: Luming Peng: [luming@nju.edu.cn](mailto:luming@nju.edu.cn)

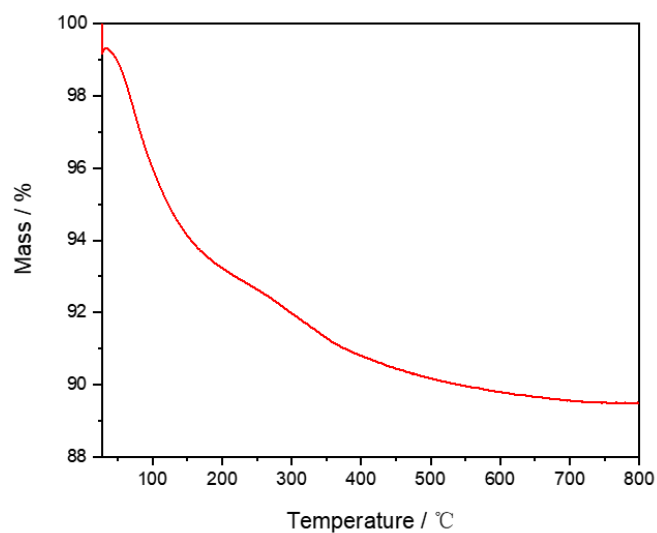

**Figure S1.** The thermogravimetric curve of the as-prepared product before high temperature calcination. The mass loss is found at a temperature lower than 400 °C, presumably due to dehydration at below 150 °C and dehydroxylation at 200 to 400 °C. The weight loss is not significant above 400 °C while a temperature as high as 700 °C is proved to be successful to transform high energy facets such as (100) and (110) to the thermodynamically stable (111) facets.<sup>1</sup> Thus a calcination temperature of 700 °C is used in the sample preparation process.

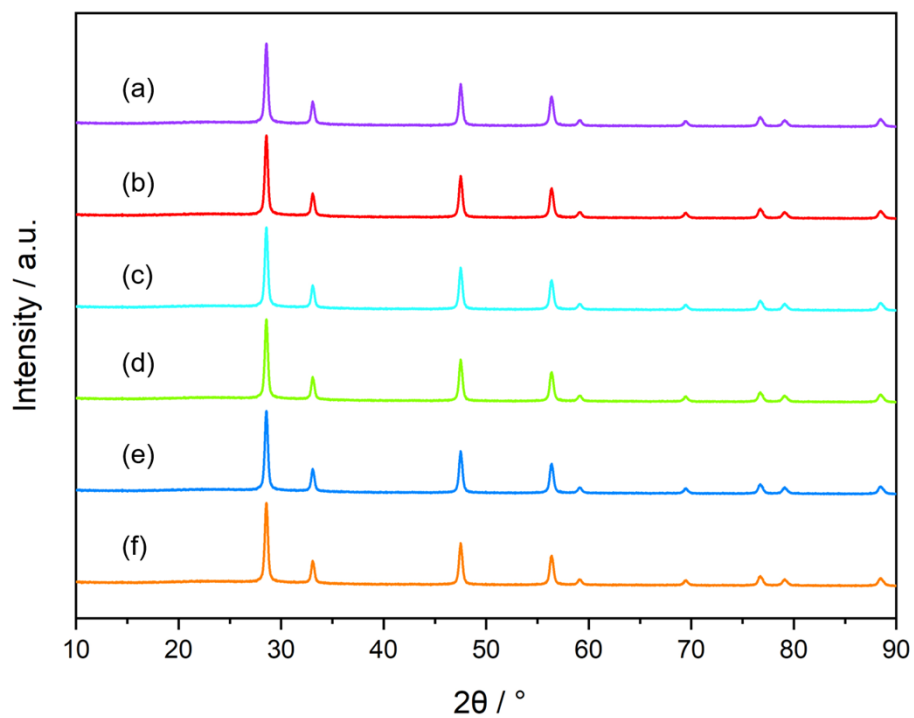

**Figure S2.** The XRD patterns of  $\text{CeO}_2$  nanostructures obtained by pouring  $0.05 \text{ mol}\cdot\text{L}^{-1}$   $\text{CeCl}_3$  solution to NaOH solutions with different concentrations. (a)  $0.1 \text{ mol}\cdot\text{L}^{-1}$ , (b)  $1 \text{ mol}\cdot\text{L}^{-1}$ , (c)  $3 \text{ mol}\cdot\text{L}^{-1}$ , (d)  $4 \text{ mol}\cdot\text{L}^{-1}$  (e)  $5 \text{ mol}\cdot\text{L}^{-1}$  and (f)  $6 \text{ mol}\cdot\text{L}^{-1}$ . Hydrothermal temperature:  $100^\circ\text{C}$ , time: 24 h. Cerium source:  $0.05 \text{ mol}\cdot\text{L}^{-1}$   $\text{CeCl}_3$  solution.

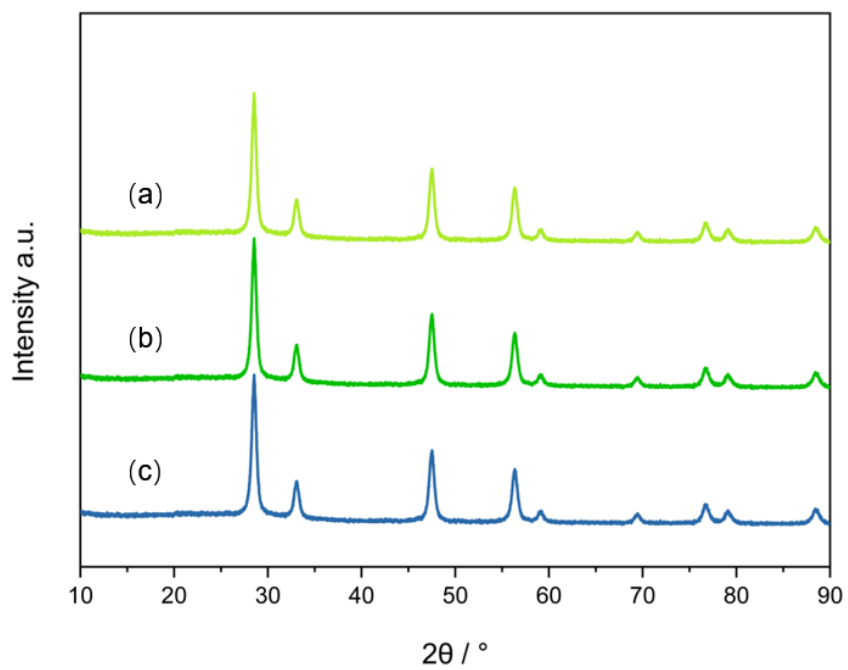

**Figure S3.** The XRD patterns of CeO<sub>2</sub> nanostructures obtained with different hydrothermal temperatures. (a) 100 °C, (b) 140 °C and (c) 180 °C. Hydrothermal time: 24 h. Cerium source: 0.05 mol·L<sup>-1</sup> CeCl<sub>3</sub> solution. NaOH solution concentration: 6 mol·L<sup>-1</sup>.

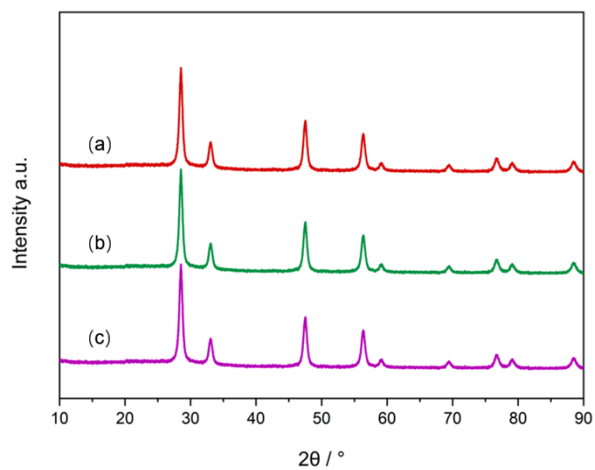

**Figure S4.** The XRD patterns of  $\text{CeO}_2$  nanostructures obtained with different hydrothermal time. (a) 12 h, (b) 24 h and (c) 36 h. Hydrothermal temperature:  $100^\circ\text{C}$ . Cerium source:  $0.05\text{ mol}\cdot\text{L}^{-1}$   $\text{CeCl}_3$  solution. NaOH solution concentration:  $6\text{ mol}\cdot\text{L}^{-1}$ .

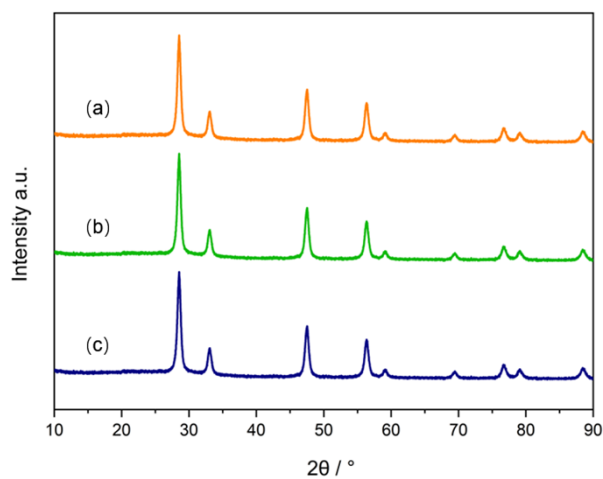

**Figure S5.** The XRD patterns of  $\text{CeO}_2$  nanostructures obtained with different cerium sources. (a)  $\text{Ce}(\text{NO}_3)_3$ , (b)  $\text{CeCl}_3$ , (c)  $\text{Ce}(\text{NH}_4)_2(\text{NO}_3)_6$ . Hydrothermal temperature and time:  $100^\circ\text{C}$  and 24 h. NaOH solution concentration:  $6\text{ mol}\cdot\text{L}^{-1}$ .

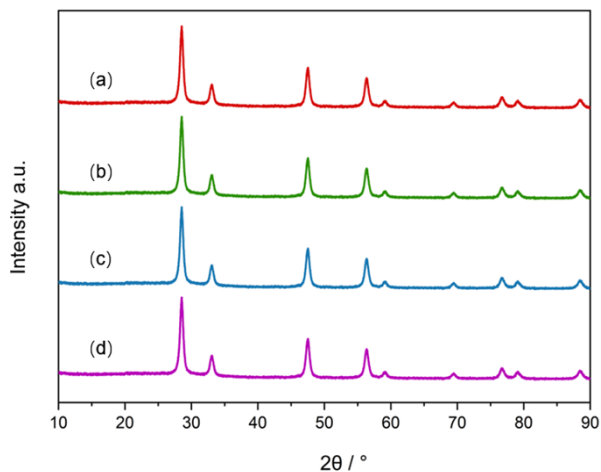

**Figure S6.** The XRD patterns of CeO<sub>2</sub> nanostructures obtained with different oxidants. (a) H<sub>2</sub>O<sub>2</sub>, (b) air (reaction time: 120 min), (c) air (reaction time: 30 min) and (d) trace oxygen in N<sub>2</sub> atmosphere. Hydrothermal temperature and time: 100 °C and 24 h. Cerium source: 0.05 mol·L<sup>-1</sup> CeCl<sub>3</sub> solution. NaOH solution concentration: 6 mol·L<sup>-1</sup>.

## References

1. B. Sudduth, D. Yun, J. Sun and Y. Wang, *J. Catal.*, 2021, **404**, 96-108.
